# Supplementary material
Source: PubMed Central journal article supplement (PMC5033749)
Supplement: jciinsight-1-86850-s001.pdf [file jciinsight-1-86850-s001.pdf]

## Supplemental document

### Supplemental methods

#### Cell preparation

For iTreg generation, splenic CD4<sup>+</sup> Tcon cells from ATG5 FLC, WT FLC, *Atg7<sup>fl/fl</sup>*-*Foxp3cre<sup>+</sup>* or *WT Foxp3cre<sup>+</sup>* mice were purified by MACS beads (CD4) positive selection according to the manufacturer's protocols (Miltenyi Biotec) and sorted based on 7AAD<sup>neg</sup>CD45.1<sup>neg</sup>CD45.2<sup>+</sup>CD4<sup>+</sup>CD25<sup>neg</sup> expression for cell from FLC mice and based on 7AAD<sup>neg</sup>CD4<sup>+</sup>YFP<sup>neg</sup> for *Atg7<sup>fl/fl</sup>*-*Foxp3cre<sup>+</sup>* or *WT Foxp3cre<sup>+</sup>* mice. Twenty-four-well plates were coated with anti-CD3 (2C11, 10 mg/ml) and anti-CD28 (N3751, 1 mg/ml) antibodies (Abs). CD4 Tcon were seeded at 0.5 or 1x 10<sup>6</sup> cells/well and resuspended in 1 ml IMDM with 10% FBS, 2 mM L-glutamine, 50 mM 2-ME, 100 U/ml penicillin, and 100 mg/ml streptomycin sulfate, supplemented with 100 U/ml recombinant human IL-2 (Aldesleukin), 10ng/ml TGF- $\beta$ 1 (BioLegend), and 100 ng/ml rapamycin (Invitrogen). 1ml of medium was added on day 3, and cells were harvested on day 5 for analysis or further studies.

To analyze cytokine production, splenic cells were stimulated with PMA (50 ng/ml) and ionomycin (500 ng/ml) for 4 h at 37°C and brefeldin A (1 mg/ml) was added for the last 3 hours to examine cytokine production.

#### Suppression assay

In round bottom 96 wells plate, 5x10<sup>4</sup> CFSE or violet dye stained splenic effector T cells (sorted CD4<sup>+</sup> CD25<sup>neg</sup> T cells from *Ptprc<sup>a</sup>* mice) were stimulated with an anti-CD3 Ab (2C11, 1 mg/ml) and with 12.5x10<sup>4</sup> DC (MHCII<sup>+</sup> CD11c<sup>+</sup>) isolated from spleen of C57BL/6 and purified using Optiprep density gradient (Elitechgroup, Australia) following by a MACS beads (CD11c) positive selection on columns according to the manufacturer's protocols (Miltenyi Biotec). Cells were incubated for 5 days with sorted 7AAD<sup>neg</sup>CD4<sup>+</sup> YFP<sup>+</sup> Treg

from  $Atg7^{fl/fl}Foxp3cre^+$  mice,  $7AAD^{neg}CD4^+ YFP^+$  Treg  $WT Foxp3cre^+$  mice or  $7AAD^{neg}CD4^+ RFP^+$  Treg Foxp3-RFP mice (ratio 1/1) or with  $Atg5^{-/-}$  or WT iTreg generated *in vitro* from FLC mice (ratio 1/4) in complete IMDM media. Effector T cell proliferation were assessed by flow cytometry analysis of CFSE or violet dye dilution in  $CD4^+ CD45.1^+$  T cells.

## Supplemental Figures

### Figure S1

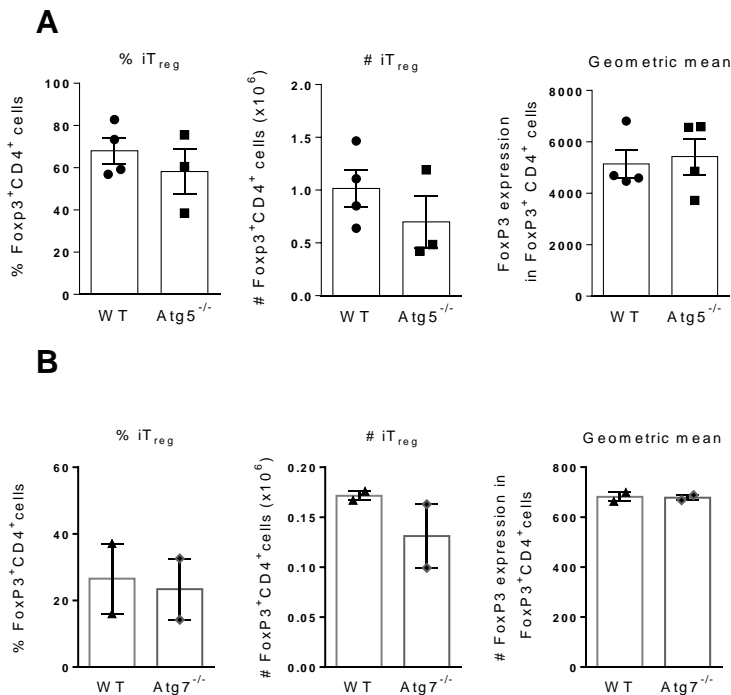

**Figure S1. Efficient in vitro generation of autophagy deficient iTreg.**

**A)** Flow cytometry analysis of WT and Atg5<sup>-/-</sup> iTreg generated in vitro from sorted splenic CD45.2<sup>+</sup>CD45.1<sup>-</sup>CD4<sup>+</sup>CD25<sup>-</sup> of WT and ATG5<sup>-/-</sup> FLC mice. Frequency (%), absolute number (#) and FoxP3 intensity (geometric mean) of iTreg ( $n = 4-3$  from 3 independent experiments). **B)** Flow cytometry analysis of WT and Atg7<sup>-/-</sup> iTreg generated in vitro from sorted splenic CD4<sup>+</sup>YFP<sup>neg</sup> of Atg7<sup>fl/fl</sup>-Foxp3cre<sup>+</sup> (Atg7<sup>-/-</sup>) or WT -Foxp3cre<sup>+</sup> (WT) mice. Frequency (%), absolute number (#) and FoxP3 intensity (geometric mean) ( $n = 2$  from 2 independent experiments). Data are shown as mean  $\pm$  SEM. Abbreviations: Induced Treg (iTreg), autophagy-related gene (Atg), Fetal Liver Chimera (FLC).

**Figure S2**

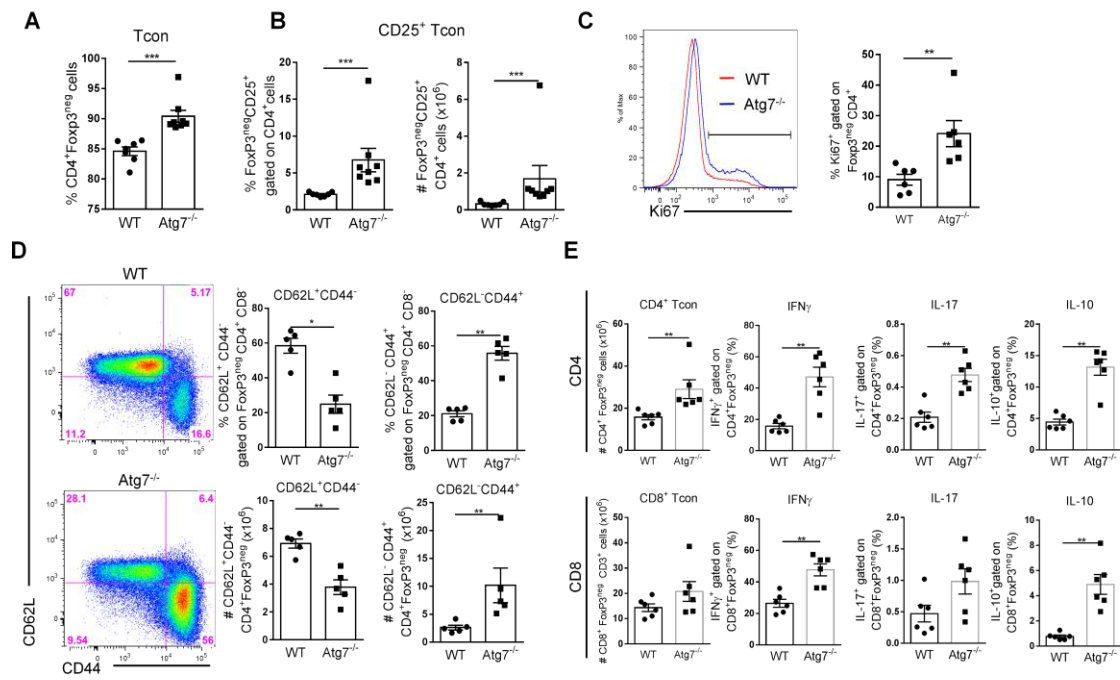

**Figure S2. Autophagy in Treg is required to control effector T cell activation.**

**(A)** Frequency (%) of CD4<sup>+</sup>FoxP3<sup>neg</sup> and **(B)** frequency (%) and absolute number (#) of CD4<sup>+</sup>FoxP3<sup>neg</sup>CD25<sup>+</sup> cells gating on CD4<sup>+</sup>CD8<sup>-</sup>CD3<sup>+</sup> T cells. **(C)** Representative histogram and diagram of frequency (%) of Ki67<sup>+</sup> cells in CD4<sup>+</sup>FoxP3<sup>neg</sup> T cells. **(D)** Representative dot plot and frequency (%) of CD62L<sup>+</sup>CD44<sup>-</sup>, CD62L<sup>-</sup>CD44<sup>+</sup> in CD4<sup>+</sup>FoxP3<sup>neg</sup> T cells. **(E)** Absolute number (#) of CD4<sup>+</sup>FoxP3<sup>neg</sup> Tcon (CD4) and CD8<sup>+</sup>FoxP3<sup>neg</sup> Tcon (CD8) and frequency (%) of IFN $\gamma$ <sup>+</sup>, IL-17<sup>+</sup> and IL-10<sup>+</sup> cells in FoxP3<sup>neg</sup> CD4<sup>+</sup> and CD8<sup>+</sup> T cells from *in vitro* restimulated splenocytes of *Atg7<sup>fl/fl</sup>-Foxp3cre<sup>+</sup>* (*Atg7<sup>-/-</sup>*) and *WT-Foxp3cre<sup>+</sup>* (*WT*) mice (male and female) (n = 6 from 2 independent experiments). Data are shown as mean  $\pm$  SEM. Statistical significance was determined using an unpaired 2-tailed Mann-Whitney U test (\*p<0.05; \*\*p<0.01; \*\*\*p<0.001). Statistical analyses were performed using GraphPad Prism Version 6.01 software. Abbreviations: conventional T cells (Tcon), autophagy-related gene (Atg).

**Figure S3**

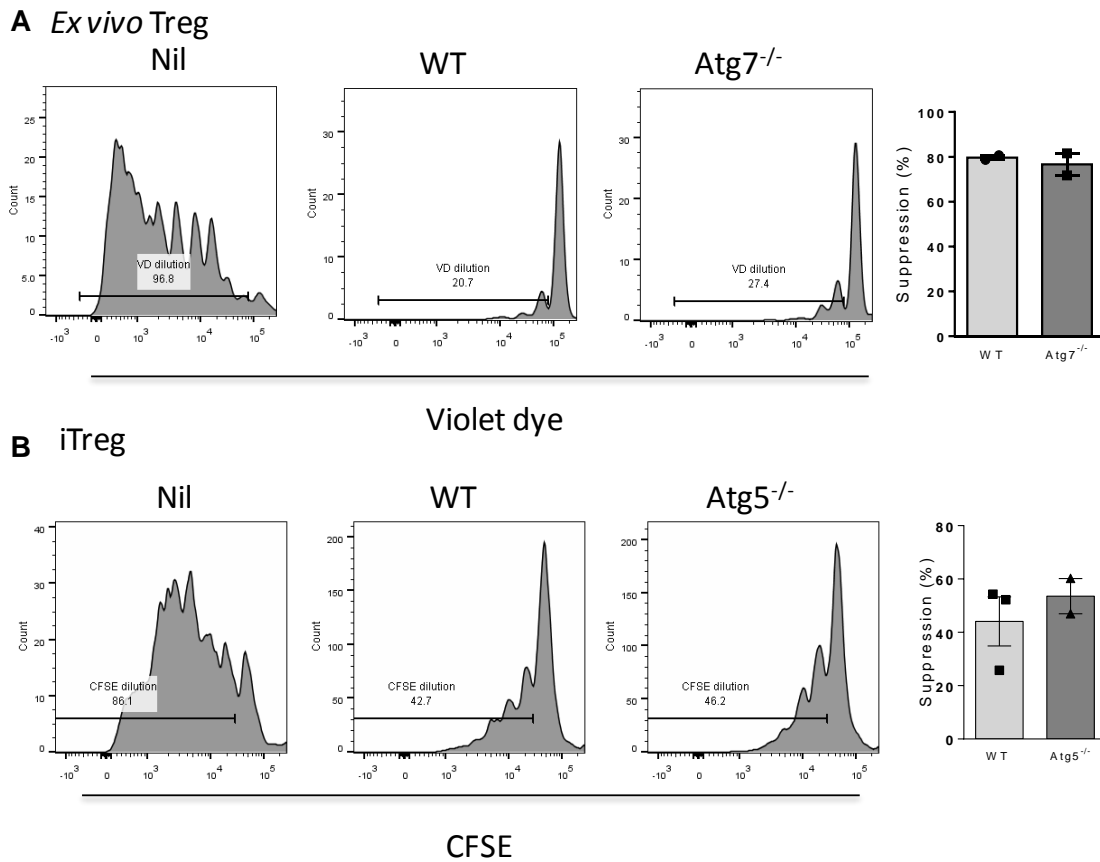

**Figure S3. Autophagy deficient Treg are suppressive in vitro.**

**A)** Representative histograms of proliferation (violet dye dilution) and percentage of inhibition of proliferation of violet dye stained stimulated splenic effector T cells (sorted  $CD4^+ CD25^{neg}$  T cells) incubated 5 days with sorted  $7AAD^{neg}CD4^+ YFP^+$  Treg from *(Atg7<sup>fl/fl</sup>-Foxp3cre<sup>+</sup> (Atg7<sup>-/-</sup>)* mice or  $7AAD^{neg}CD4^+ RFP^+$  Treg from *Foxp3-RFP* mice or **WT-Foxp3cre<sup>+</sup>** (WT) (ratio 1/1) (n=2 from 2 independent experiments). **B)** Representative histograms of proliferation (CFSE dilution) and percentage of inhibition of proliferation of CFSE stained and stimulated splenic effector T cells (sorted  $CD45.1^+CD4^+CD25^{neg}$ ) incubated 5 days with *Atg5<sup>-/-</sup>* and WT iTreg generated in vitro from FLC mice (ratio 1/4) (n=2 from 2 experiments). Abbreviations: 7-Aminoactinomycin D (7-AAD), Yellow fluorescent protein (YFP), autophagy-related gene (Atg), Red Fluorescent Protein (RFP), Carboxyfluorescein succinimidyl ester (CFSE), Induced Treg (iTreg), Fetal Liver Chimera (FLC).

**Figure S4**

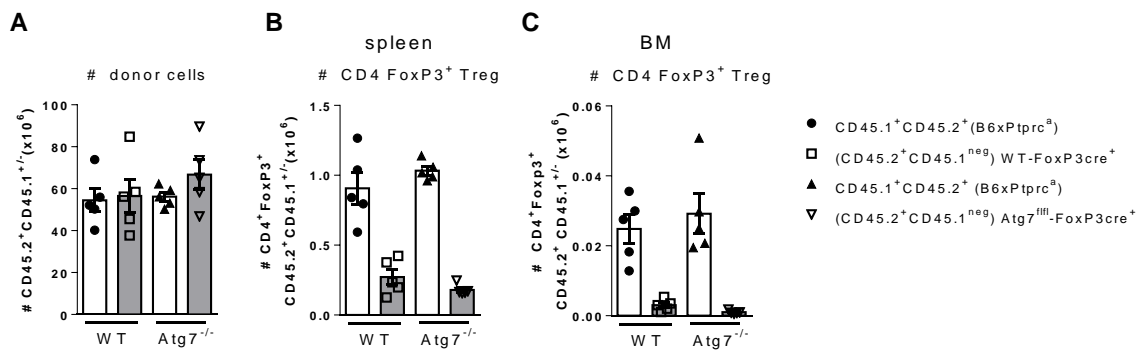

**Figure S4. Reduced reconstitution of Cre<sup>+</sup> Treg compare to Cre<sup>neg</sup> Treg**

(A-C) Cytometry analysis of *Atg7*<sup>-/-</sup> and WT mixed chimera generated by injecting BM from *Atg7*<sup>fl/fl</sup>-*Foxp3cre*<sup>+</sup> (CD45.2<sup>+</sup>) (*Atg7*<sup>-/-</sup>) or *WT-Foxp3cre*<sup>+</sup> (CD45.2<sup>+</sup>) (WT) mice with equal number of BM from congenic (CD45.1<sup>+</sup> CD45.2<sup>+</sup>) mice into irradiated syngenic Ptprc<sup>a</sup> mice (CD45.1<sup>+</sup>) (n = 5). (A) Absolute number of total donor cells CD45.1<sup>+</sup> CD45.2<sup>+</sup> and CD45.1<sup>neg</sup> CD45.2<sup>+</sup> in spleen of WT and *Atg7*<sup>-/-</sup> groups. Absolute number of Treg CD4<sup>+</sup> FoxP3<sup>+</sup> from congenic (CD45.1<sup>+</sup> CD45.2<sup>+</sup>) donor cells or from *Atg7*<sup>fl/fl</sup>-*Foxp3cre*<sup>+</sup> (CD45.2<sup>+</sup>) or *WT-Foxp3cre*<sup>+</sup> donor cells in spleen (B) or BM (C) of recipients. Data are shown as mean ± SEM. Statistical significance was determined using an unpaired 2-tailed Mann-Whitney U test (\*p<0.05; \*\*p<0.01; \*\*\*p<0.001). Statistical analyses were performed using GraphPad Prism Version 6.01 software. Abbreviations: *autophagy*-related gene (*Atg*).

**Figure S5**

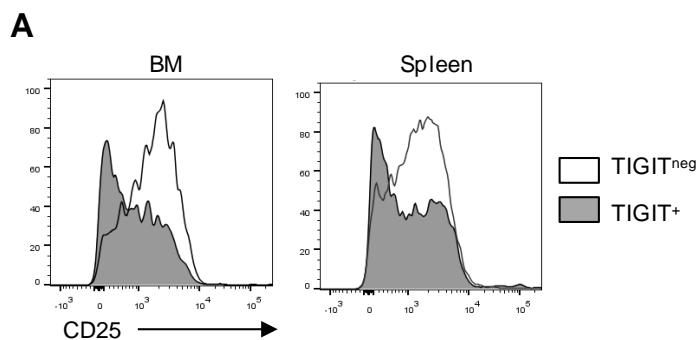

**Figure S5. CD25 expression on TIGIT<sup>+</sup> and TIGIT<sup>neg</sup> Treg in spleen and BM of C57BL/6 mice. (A) Overlay of histograms representing CD25 expression on TIGIT<sup>+</sup> or TIGIT<sup>neg</sup> FoxP3<sup>+</sup> CD4<sup>+</sup> Treg of C57BL/6 mice using intracellular staining to stain FoxP3.**
